# Supplementary material for: Pre-Bleaching Coral Microbiome Is Enriched in Beneficial Taxa and Functions
Source: MDPI journal article supplement (doi:10.3390/microorganisms12051005), 2024-05-16
Supplement: s1 [file s1]

## Supplemental Material

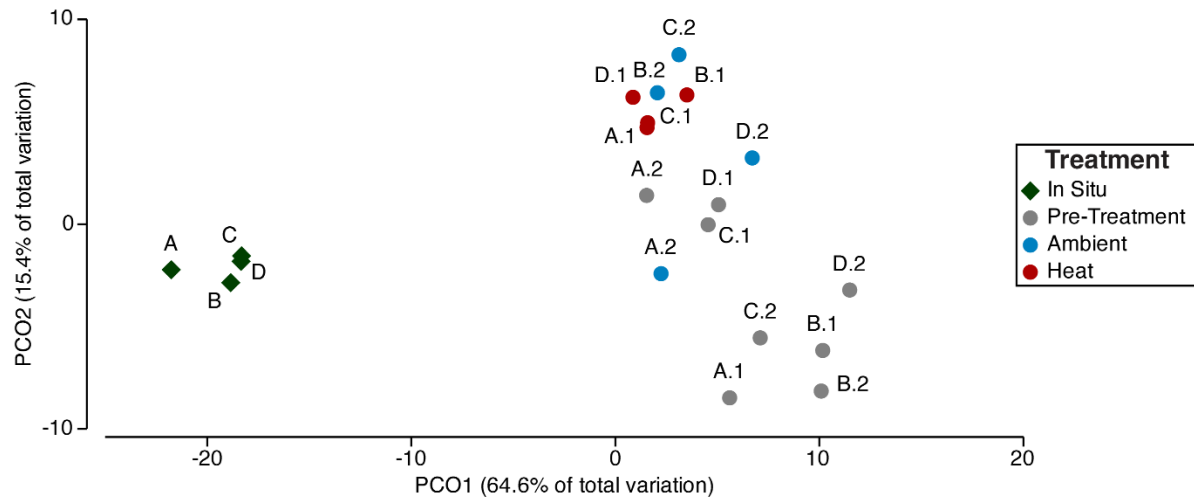

**Figure S1.** Principal coordinate analyses of the metagenomes associated with the coral SML microbiome of *P. strigosa* exposed to different temperature treatments. The microbiomes of four coral colonies (A, B, C, D) were sampled in their natural environment before the coral colonies were removed and replicated into two fragments (coral nubbins) each (A.1, A.2, B.1, B.2, C.1, C.2, D.1, D.2). After an acclimation period of two weeks, the microbiomes of the coral nubbins were sampled before (pre-treatment) and after being exposed to ambient and heat treatments for one week. The analysis was based on a Bray-Curtis similarity matrix of the relative abundances of the bacterial genera.

**Table S1.** Metagenomic sequences coverage from each sample available on the MG-RAST server.

**Supplemental Table 1.** Metagenomic sequences coverage in MG-RAST server

| Metagenome name                     | Coral colony ID | Coral nubbin ID | Treatment     | Total number of sequences |
|-------------------------------------|-----------------|-----------------|---------------|---------------------------|
| IR1AA-1-Inner-Heat-R1-21Jun2017     | IR-1            | IR-1.1          | Heat          | 683,893                   |
| IR1AA-1-Inner-Pre-R3-15Jun2017      | IR-1            | IR-1.1          | Pre-treatment | 368,182                   |
| IR1AA-4-Inner-Ambient-R3-21Jun2017  | IR-1            | IR-1.2          | Ambient       | 356,426                   |
| IR1AA-4-Inner-Pre-R2-15Jun2017      | IR-1            | IR-1.2          | Pre-treatment | 453,083                   |
| IR3LL1-3-Inner-Heat-R3-21Jun2017    | IR-2            | IR-2.1          | Heat          | 498,213                   |
| IR3LL1-3-Inner-Pre-R4-15Jun2017     | IR-2            | IR-2.1          | Pre-treatment | 460,170                   |
| IR3LL1-4-Inner-Ambient-R2-21Jun2017 | IR-2            | IR-2.2          | Ambient       | 1,009,994                 |
| IR3LL1-4-Inner-Pre-R3-15Jun2017     | IR-2            | IR-2.2          | Pre-treatment | 936,937                   |
| OR2LL-1-Outer-Ambient-R2-21Jun2017  | OR-1            | OR-1.2          | Ambient       | 715,686                   |
| OR2LL-1-Outer-Pre-R4-15Jun2017      | OR-1            | OR-1.2          | Pre-treatment | 674,319                   |
| OR2LL-2-Outer-Heat-R3-21Jun2017     | OR-1            | OR-1.1          | Heat          | 1,164,365                 |
| OR2LL-2-Outer-Pre-R3-15Jun2017      | OR-1            | OR-1.1          | Pre-treatment | 535,735                   |
| OR3AA-3-Outer-Ambient-R1-21Jun2017  | OR-2            | OR-2.2          | Ambient       | 1,296,198                 |
| OR3AA-3-Outer-Pre-R1-15Jun2017      | OR-2            | OR-2.2          | Pre-treatment | 845,883                   |
| OR3AA-4-Outer-Heat-R1-21Jun2017     | OR-2            | OR-2.1          | Heat          | 840,108                   |
| OR3AA-4-Outer-Pre-R3-15Jun2017      | OR-2            | OR-2.1          | Pre-treatment | 580,876                   |

**Table S2.** Richness (S), Pielou's evenness index (J'), and Shannon's diversity index (H') of microbial genera from the coral SML metagenomes across different treatments and time periods.

| Treatment               | S         | J'           | H'          |
|-------------------------|-----------|--------------|-------------|
| <i>In situ</i> (Time 0) | 582 - 586 | 0.74 ± 0.02  | 4.72 ± 0.14 |
| Heat (Time 2)           | 579 - 587 | 0.63 ± 0.004 | 4.04 ± 0.03 |
| Ambient (Time 2)        | 580 - 585 | 0.62 ± 0.04  | 3.93 ± 0.24 |
| Pre-treatment (Time 1)  | 578 - 585 | 0.55 ± 0.05  | 3.47 ± 0.32 |
